# Supplementary material for: BiOBr/BiOCl/carbon quantum dot microspheres with superior visible light-driven photocatalysis
Source: Royal Society of Chemistry journal article supplement (doi:10.1039/c7ra10344a), 2017-01-01
Supplement: c7ra10344a1.pdf [file c7ra10344a1.pdf]

## Supplementary Material

# BiOBr/BiOCl/carbon quantum dots microspheres with superior visible light-driven photocatalysis

Chenhui Zhao<sup>\*a,b</sup>, Ying Liang<sup>a,b</sup>, Wei Li<sup>c</sup>, Yi Tian<sup>a,b</sup>, Xin Chen<sup>a,b</sup>, Dezhong Yin<sup>a,b</sup>, Qiuyu Zhang<sup>\*a,b</sup>

<sup>a</sup>Department of Applied Chemistry, College of Science, Northwestern Polytechnical University, Xi'an 710072, China

<sup>b</sup>Key Laboratory of Space Physics and Chemistry, Ministry of Education, Northwestern Polytechnical University, P. O. Box 624, Xi'an 710072, China

<sup>c</sup>Department of Applied Chemistry, College of Chemistry and Chemical Engineering, Shaanxi University of Science & Technology, Xi'an 710021, China

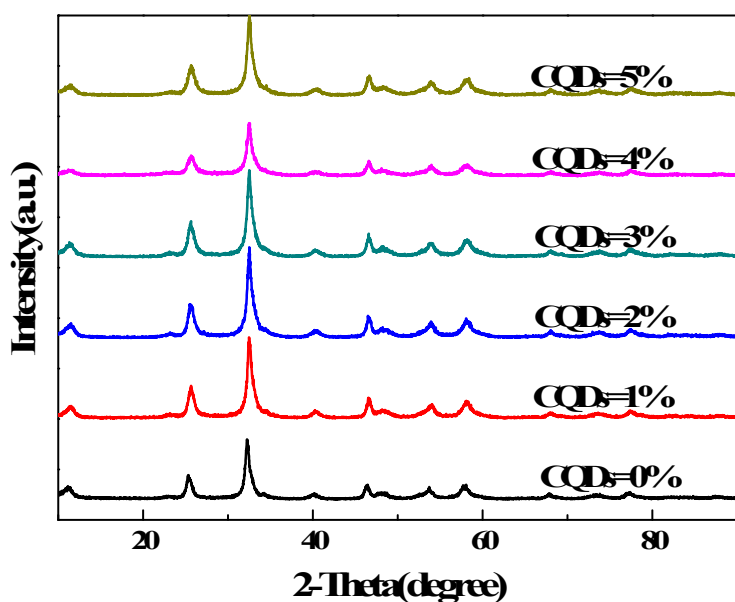

Fig.S1 XRD patterns of BiOBr/BiOCl/CQDs materials with different CQDs amounts.

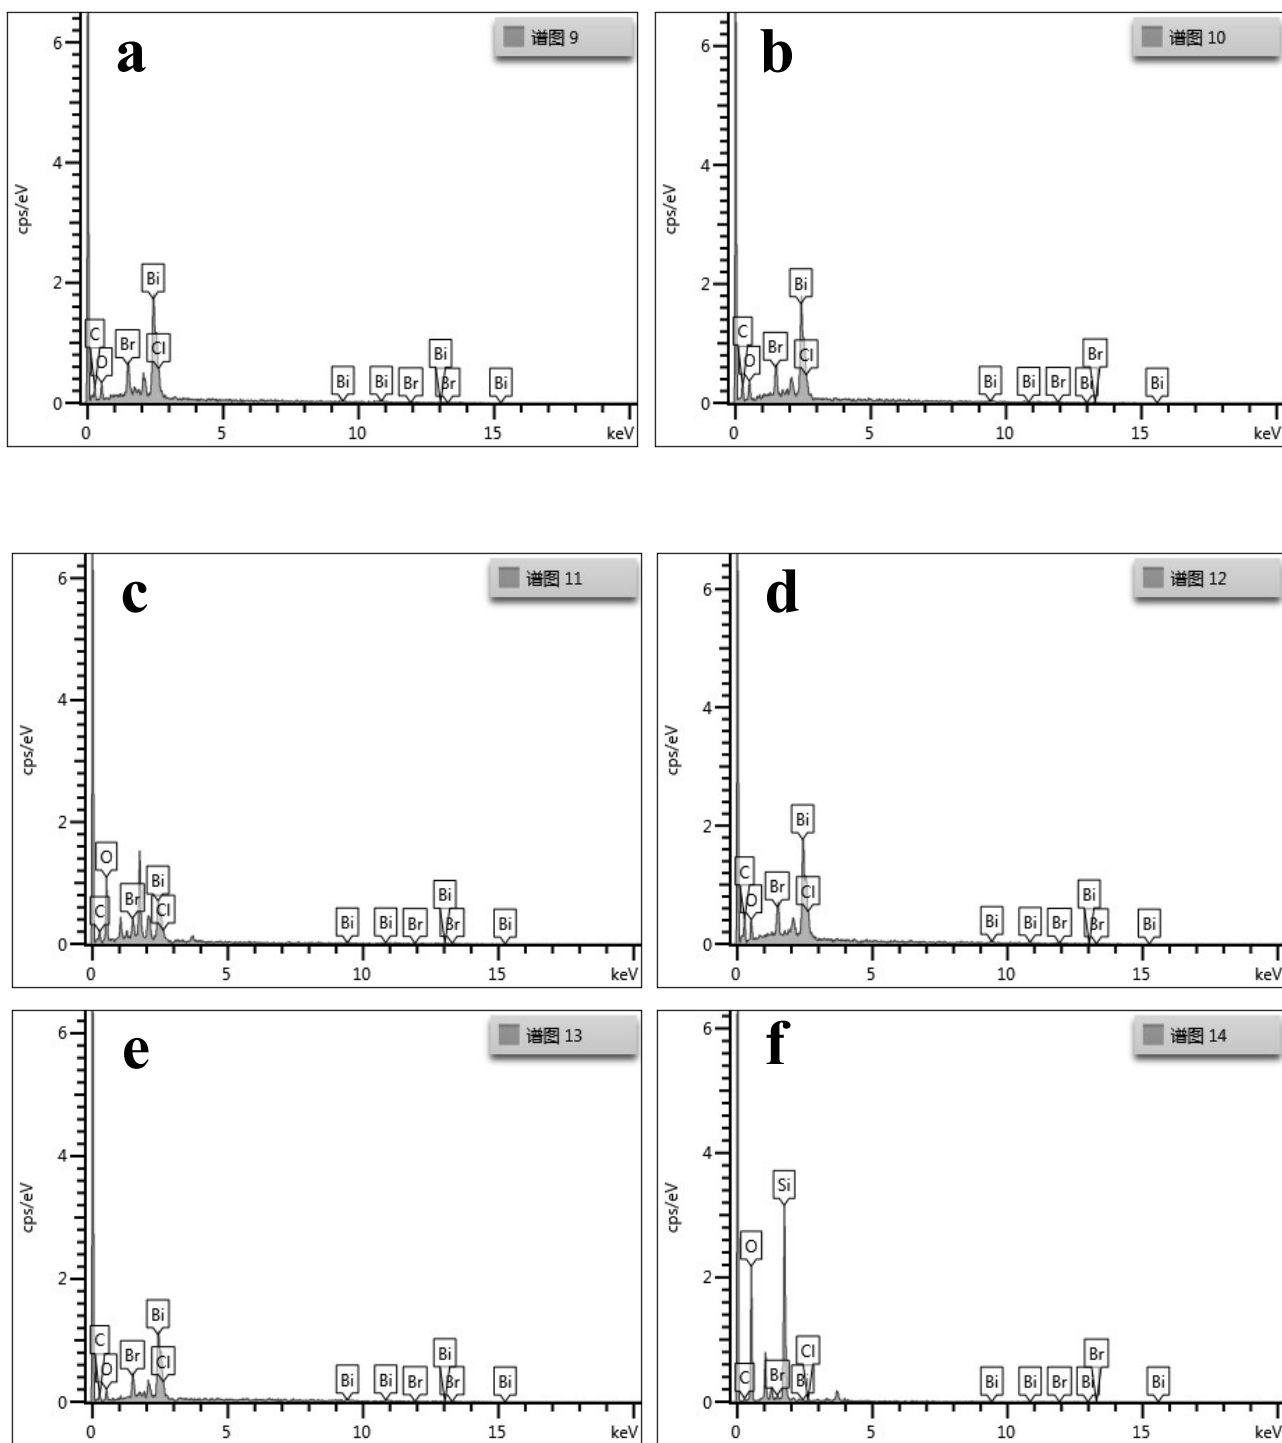

**Fig.S2** Energy dispersion X-ray spectroscopy (EDS) of BiOBr/BiOCl/CQDs materials with different CQDs amounts: (a) 0 %, (b) 1 wt%, (c) 2 wt%, (d) 3 wt%, (e) 4 wt% and (f) 5 wt%.

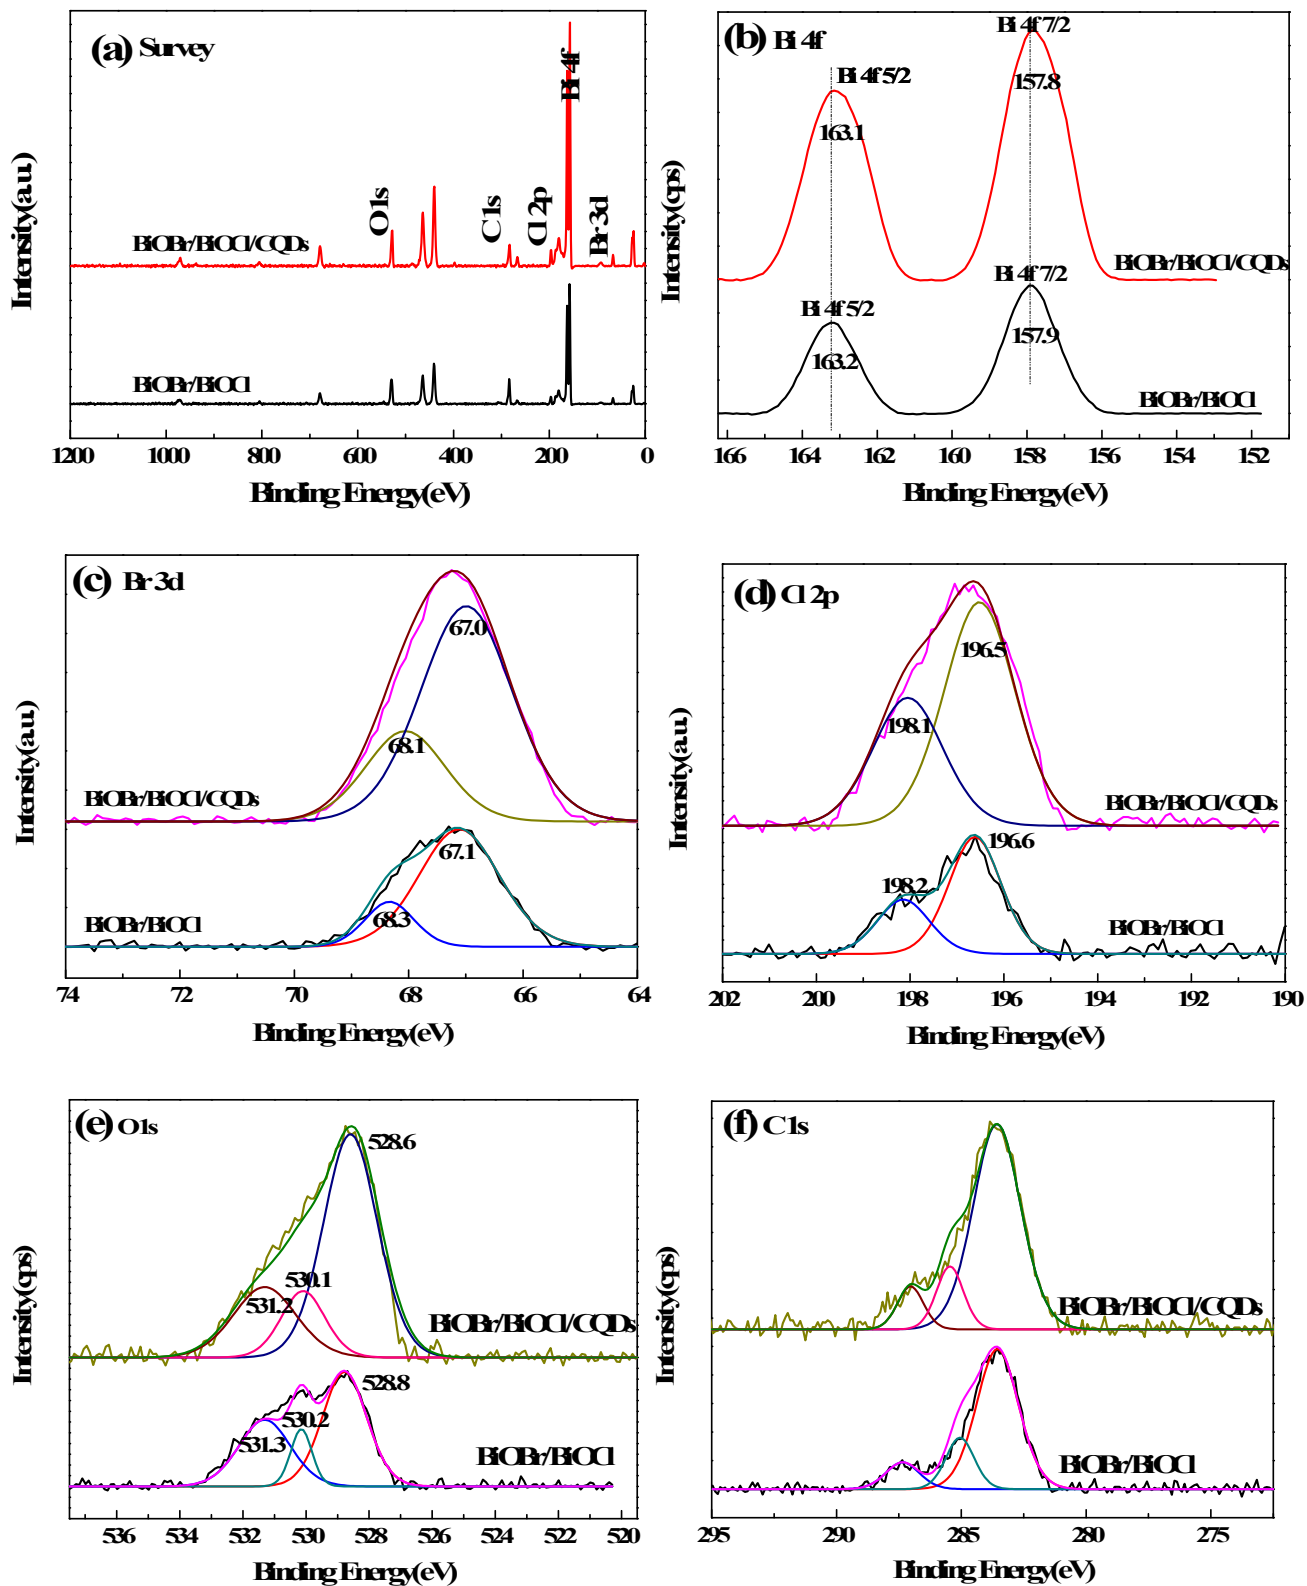

Fig.S3 XPS spectra of BiOBr/BiOCl and BiOBr/BiOCl/CQDs-4%: (a) survey spectra, (b) Bi 4f, (c) Br 3d, (d) Cl 2p, (e) O 1s and (f) C 1s core-level spectra.

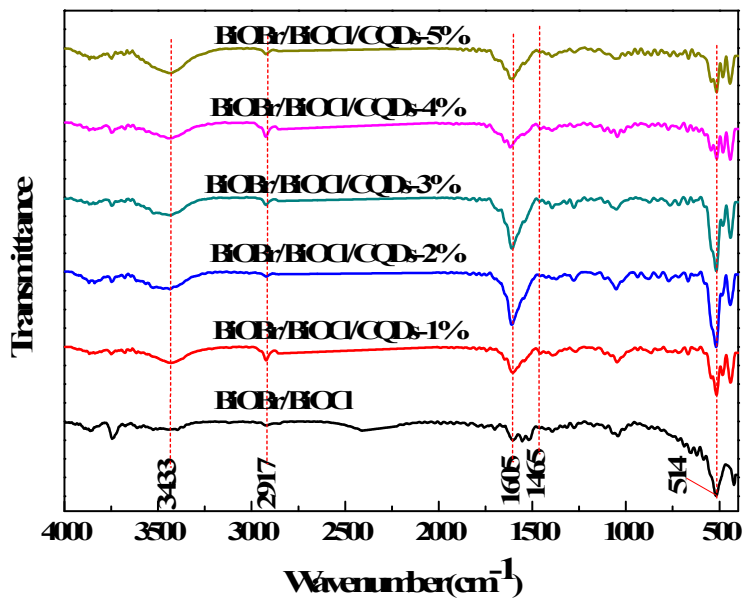

Fig.S4 FT-IR spectra of BiOBr/BiOCl/CQDs samples with different CQDs contents.

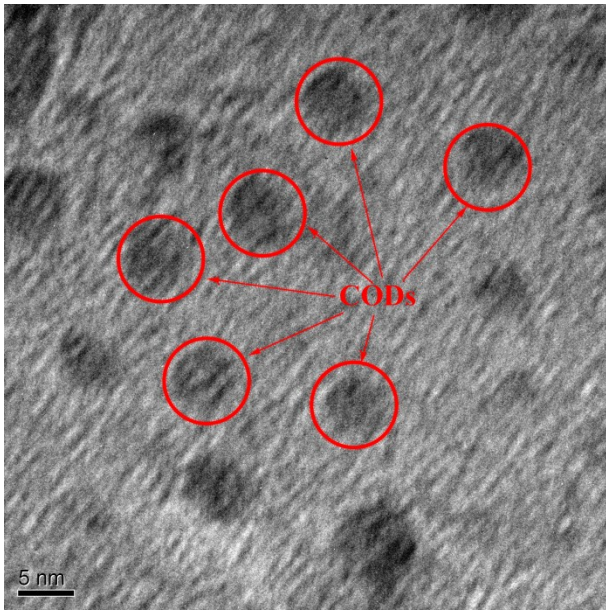

**Fig. S5** HETEM of BiOBr/BiOCl/CQDs-4%.

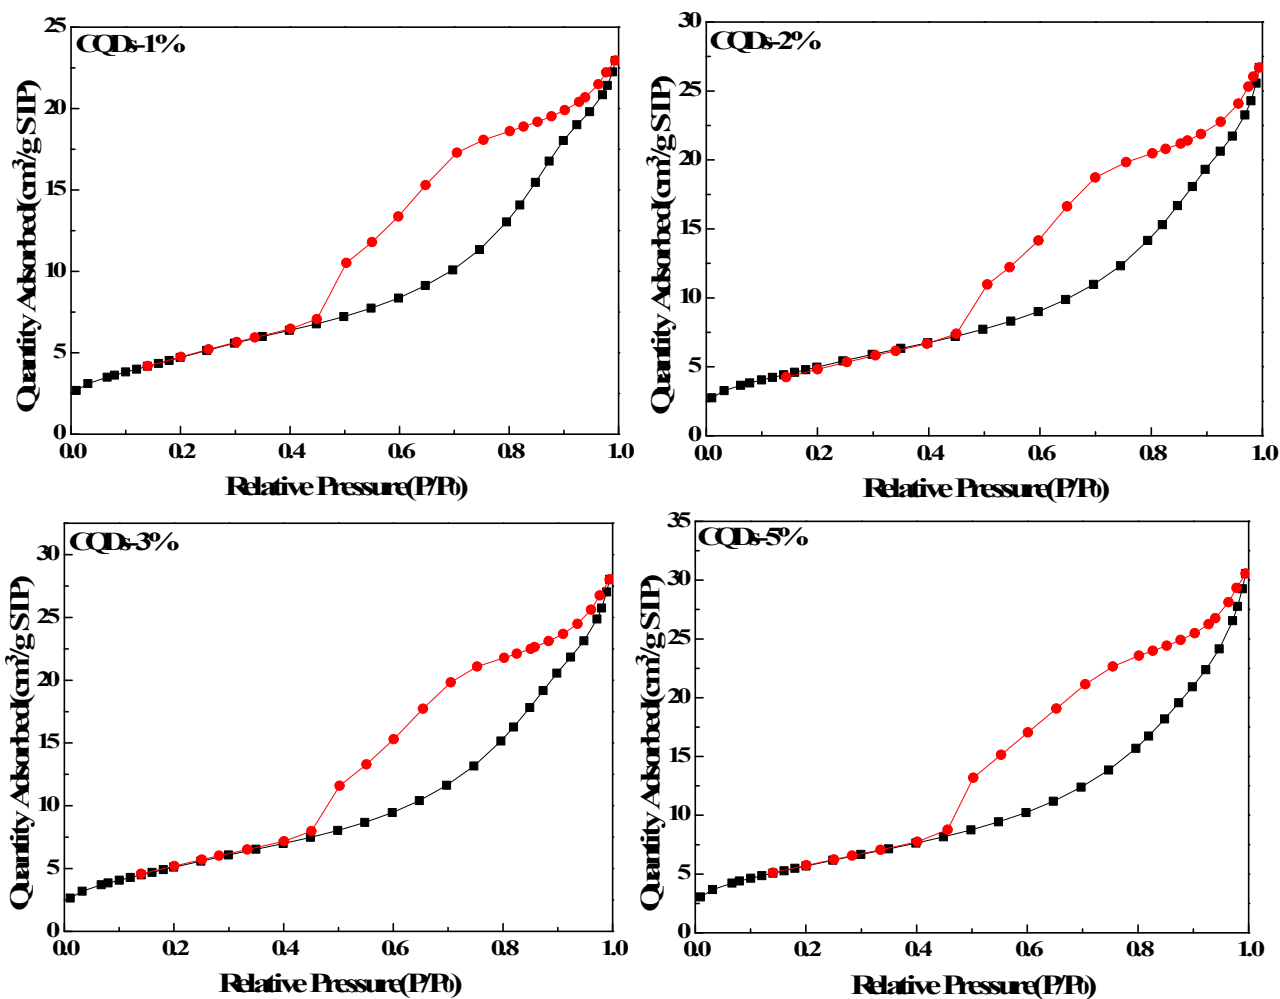

**Fig. S6** Nitrogen absorption-desorption isotherms of BiOBr/BiOCl/CQDs materials with different CQDs content: (a) 1%, (b) 2%, (c) 3%, (d) 5%.

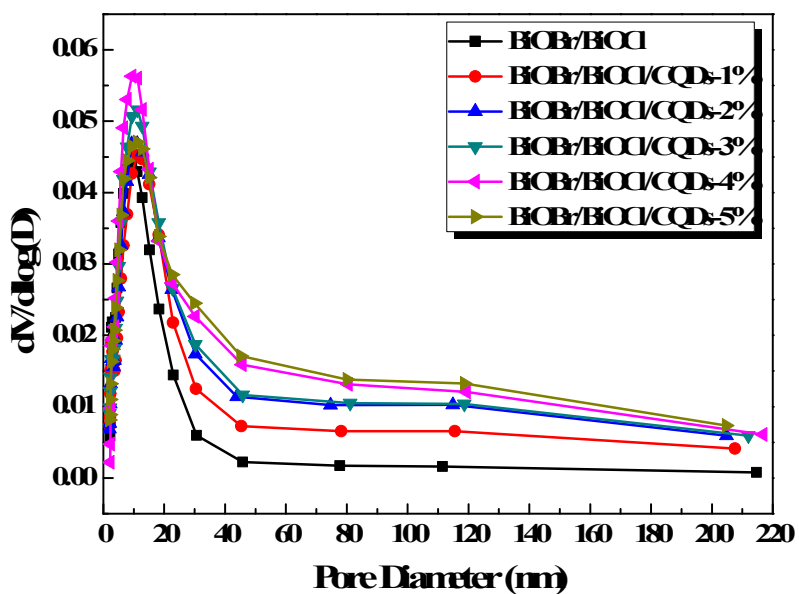

Fig. S7 Diameter distribution of BiOBr/BiOCl/CQDs materials with different CQDs content.

Table S1 Main parameter of N<sub>2</sub> adsorption-desorption isotherm of BiOBr/BiOCl/CQDs.

| Sample<br>BiOBr/BiOCl/CQDs-x | BET Surface Area<br>(m <sup>2</sup> /g) | BJH pore volume<br>(cm <sup>3</sup> /g) | Average pore size<br>(nm) |
|------------------------------|-----------------------------------------|-----------------------------------------|---------------------------|
| 0                            | 17.9                                    | 0.030280                                | 6.8                       |
| 1%                           | 17.4                                    | 0.035488                                | 8.2                       |
| 2%                           | 18.5                                    | 0.041291                                | 8.9                       |
| 3%                           | 19.2                                    | 0.043343                                | 9.0                       |
| 4%                           | 17.4                                    | 0.046974                                | 10.8                      |
| 5%                           | 21.1                                    | 0.047261                                | 9.0                       |

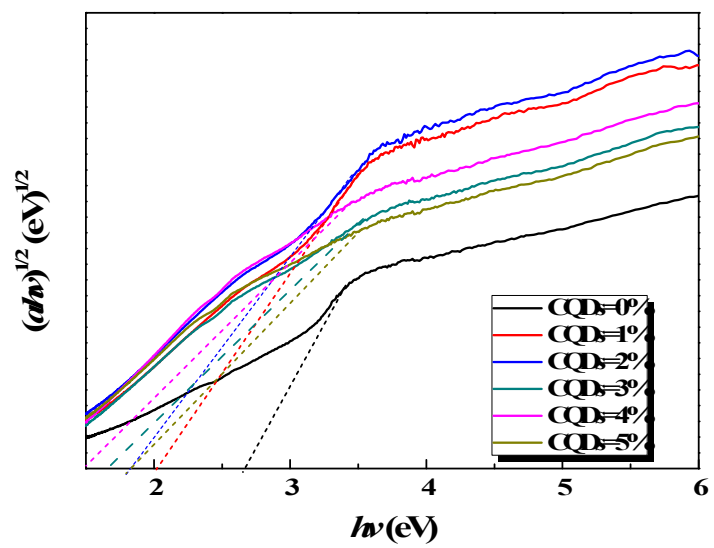

Fig. S8  $(\alpha h\nu)^{1/2}$  vs  $h\nu$  curves of BiOBr/BiOCl/CQDs materials with different contents of CQDs.



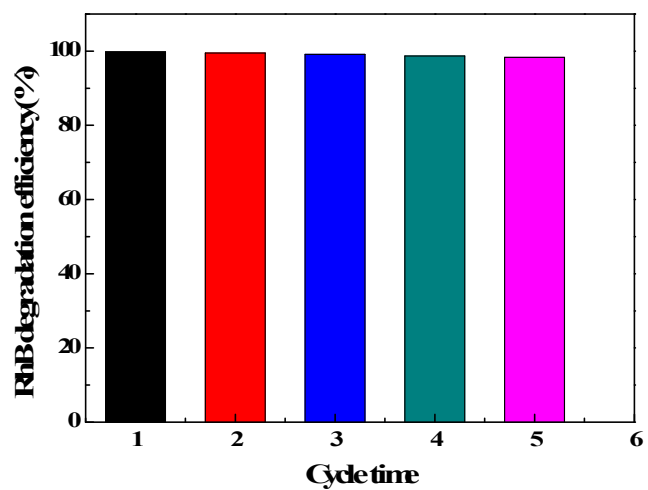

**Fig. S9** Cycling runs for the photodegradation of RhB in the presence of BiOBr/BiOCl/CQDs-4% materials under visible light irradiation.

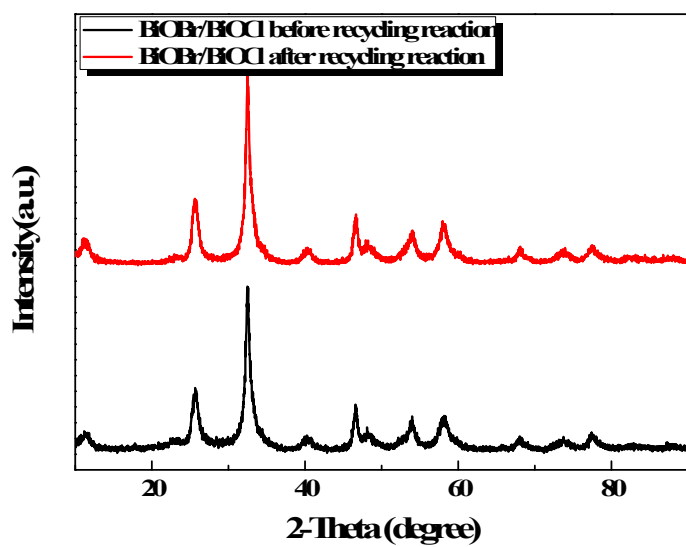

**Fig. S10** XRD patterns of the BiOBr/BiOCl/CQDs-4% photocatalyst before and after being used for five times.
